# Supplementary material for: Synbiotic therapy with Clostridium sporogenes and xylan promotes gut-derived indole-3-propionic acid and improves cognitive impairments in an Alzheimer's disease mouse model
Source: Royal Society of Chemistry journal article supplement (doi:10.1039/d4fo00886c), 2024-01-01
Supplement: d4fo00886c1.pdf [file d4fo00886c1.pdf]

## Supplementary Tables and Figures

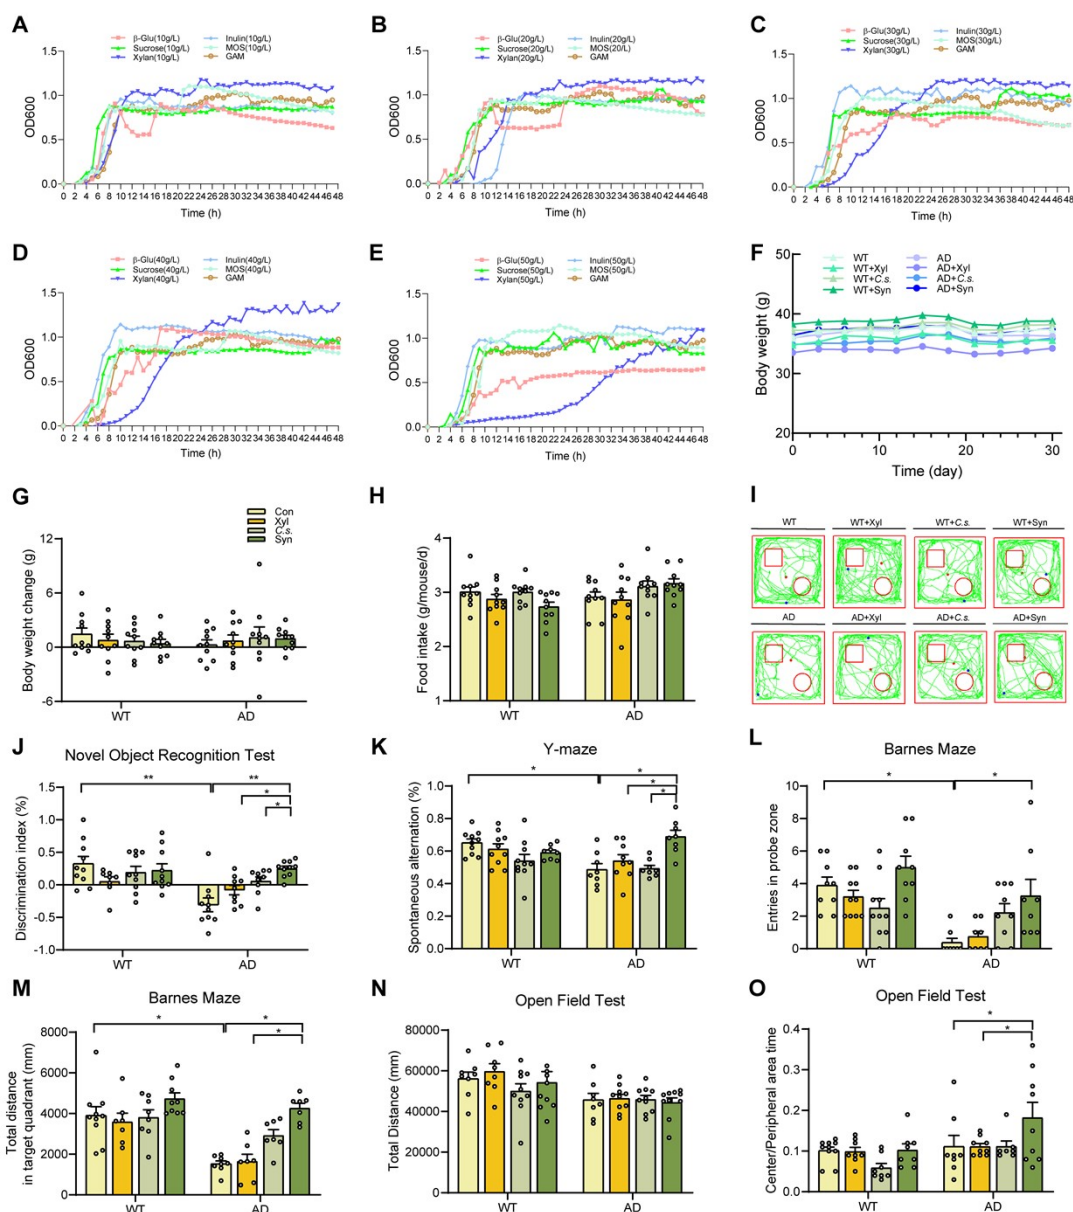

**Fig.S1 Effect of different carbon sources on the growth curve of *C. sporogenes***

**(A-E)** Growth curves of *C. sporogenes* containing different concentrations of carbon source, 10 g/L (A), 20 g/L (B), 30 g/L (C), 40 g/L (D), and 50 g/L (E) (n = 3). **(F)** Body weight change trend across all 8 groups. (The groups included WT+Xyl, WT+C.s. and WT+Syn groups). **(G)** Body weight change across all 8

groups. **(H)** Food intake across all 8 groups (n = 8-10). **(I)** (D) Mouse trajectory of the new object recognition test across all 8 groups (n = 8-10). **(J)** The discrimination index of the new object recognition test across all 8 groups. (n = 8-10). **(K)** The spontaneous alternation of the Y-maze test across all 8 groups (n = 8-10). **(L)** Quantitative assessment of the number of times each mouse poked its head into each hole of the Barnes maze across all 8 groups (n = 8-10). **(M)** The total distance in target quadrant of the Barnes maze across all 8 groups (n = 8-10). **(N) (H)** The total distance traveled by mice in the open field test across all 8 groups (n = 8-10). **(O)** Center/peripheral area time in the open field test across all 8 groups (n = 8-10). Data are mean  $\pm$  SEM. \*p < 0.05, \*\*p < 0.01. Significant differences among means were determined by two-way ANOVA with Tukey's multiple comparisons test.

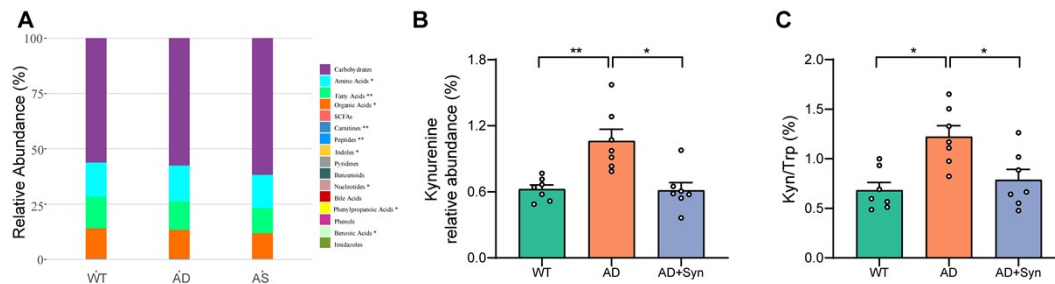

**Fig.S2 Effects of synbiotic on plasma metabolites in 5xFAD mice**

**(A)** Relative abundance of different types of metabolites in serum. **(B)** Relative abundance of kynurenine in serum (n = 7). **(C)** Relative abundance of kyn/trp in serum (n = 7). Data are mean  $\pm$  SEM. \*p < 0.05, \*\*p < 0.01. Significant differences among means were determined by one-way ANOVA with Tukey's multiple comparisons test.

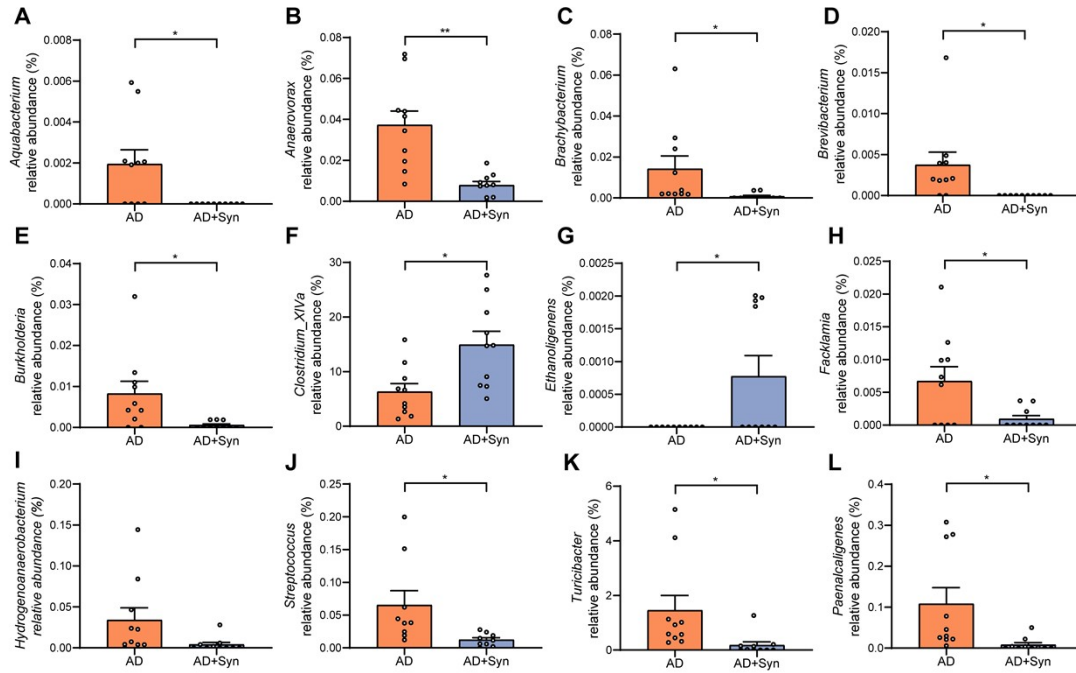

**Fig.S3 Effects of synbiotic on gut microbiota in 5xFAD mice**

(A-L) Relative abundance of *Aquabacterium*, *Anaerovorax*, *Brachybacterium*, *Brevibacterium*, *Burkholderia*, *Clostridium\_XIVa*, *Ethanoligenens*, *Facklamia*, *Hydrogenoanaerobacterium*, *Streptococcus*, *Turicibacter*, and *Paenaltcaligenes* at the genus level (n = 9-10). Data are mean  $\pm$  SEM. \*p < 0.05, \*\*p < 0.01. Data are mean  $\pm$  SEM. \*p < 0.05, \*\*p < 0.01. Significant differences between means were determined by t-test.

**Table S1** Compositions of AIN-93M diet

| Classification         | Content (g/kg) |
|------------------------|----------------|
| Corn Starch            | 465.700        |
| Maltodextrin           | 155.000        |
| Casein                 | 140.000        |
| Sucrose                | 100.000        |
| Cellulose              | 50.000         |
| Soybean Oil            | 40.000         |
| Mineral Mix, M1021     | 35.000         |
| Vitamin Mix, V1010     | 10.000         |
| L-Cystine              | 1.800          |
| Choline chloride       | 2.500          |
| Tert-Butylhydroquinone | 0.036          |
| Total (g)              | 1000.000       |

**Table S2** Formulation of carbon source added to the culture medium

| Concentration (g/L)                                                     | 5     | 10    | 20    | 30    | 40    |
|-------------------------------------------------------------------------|-------|-------|-------|-------|-------|
| GAM (mL)                                                                | 5     | 5     | 5     | 5     | 5     |
| MOS (Xi'an Yuen<br>sun Biological Technology Co., Ltd.) (g)             | 0.025 | 0.050 | 0.100 | 0.150 | 0.200 |
| Xylan(X820567, Macklin Bio-Technology<br>Co., Ltd, Shanghai, China) (g) | 0.025 | 0.050 | 0.100 | 0.150 | 0.200 |
| Inulin(S11143, Yuanye Bio-Technology<br>Co., Ltd, Shanghai, China)      | 0.025 | 0.050 | 0.100 | 0.150 | 0.200 |
| $\beta$ -Glu ( $\beta$ -Glu is from highland barley)                    | 0.025 | 0.050 | 0.100 | 0.150 | 0.200 |

**Table S3** Primer sequences used for rRT-qPCR

| Name                           | Forward Primers (5'-3')  | Reverse Primers (5'-3')       |
|--------------------------------|--------------------------|-------------------------------|
| <i>APP</i>                     | GCTGCCAGCTTGGCACTGC      | GGCAACGGTAAGGAATCACGATGTGGGTG |
| <i>PSD-95</i>                  | TCTGTGCGAGAGGTAGCAGA     | AAGCACTCCGTGAACTCCTG          |
| <i>TNF-<math>\alpha</math></i> | CTCATGCACCACCATCAAGG     | ACCTGACCACTCTCCCTTTG          |
| <i>IBA-1</i>                   | TGATGAGGATCTGCCGTCCAAACT | TCTCCAGCATTGCTTCAAGGACA       |
| <i>MUC2</i>                    | GAAGCCAGATCCCGAAACCA     | CCAGCTTGTGGGTGAGGTAG          |
| <i>ZO-1</i>                    | TGGGAACAGCACACAGTGAC     | GCTGGCCCTCCTTTTAACAC          |
| <i>Claudin-1</i>               | AGCTGCCTGTTCCATGTACT     | CTCCCATTTGTCTGCTGCTC          |
| <i>COX-2</i>                   | TGAGCAACTATTCCAAACCAGC   | GCACGTAGTCTTCGATCACTATC       |
| <i>Mdr1b</i>                   | TACATCTTGGCGGACCTTAC     | CGCTGGTTTCTTTTCTTTCTTC        |
| <i>Cyp3a11</i>                 | TCTACCGATATGGGACTC       | AAATGATGTGCTGGTGAT            |
| <i>16S rDNA</i>                | AGAGTTTGATCCTGGCTCAG     | CTGCTGCCTCCCGTAGGAGT          |
| <i>GAPDH</i>                   | TGGAGAAACCTGCCAAGTATGA   | TGGAAGAATGGGAGTTGCTGT         |

**Table S4** Formulation of carbon source added to the culture medium

| Subject class | EC number   | Known Activities             |
|---------------|-------------|------------------------------|
| CE4           | EC 3.2.1.37 | $\beta$ -xylosidase          |
| GH1           | EC 3.1.1.72 | Acetyl xylan esterase        |
| GH55          | EC 3.2.1.58 | exo- $\beta$ -1, 3-glucanase |
| GH1           | EC 3.2.1.25 | $\beta$ -mannosidase         |
